# Supplementary material
Source: publisher site journal article supplement (https://www.dovepress.com/article/397892)
Supplement: Supplementary file 1 [file 397892-Figure-S1.pdf › 397892-Figure-S1.pdf]

A

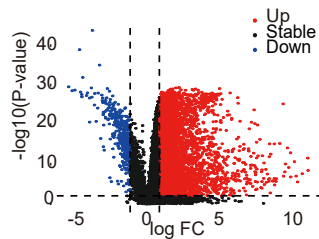

B

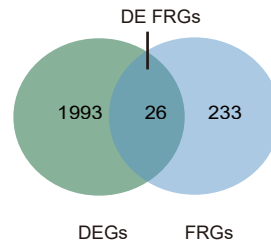

C

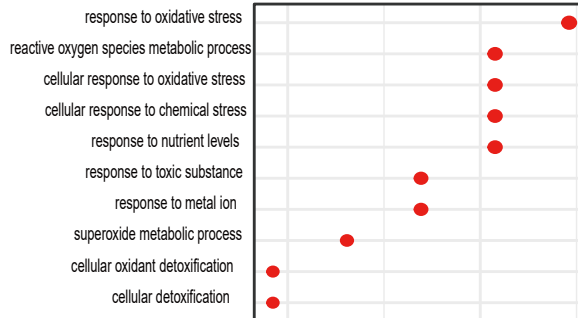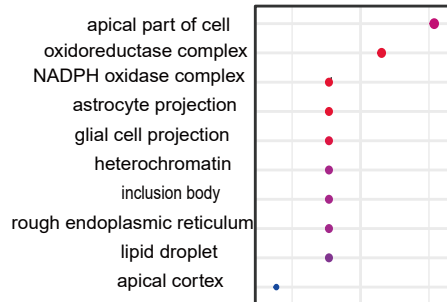

oxidoreductase activity acting on NODPH

antioxidant activity

NADP binding

flavin adenine dinucleotide binding

heme binding

tetrapyrrole binding

iron ion binding

superoxide-generating NAD(P)H oxidase activity

oxidoreductase activity acting on NAD(P)H, oxygen as acceptor

oxidoreductase activity acting on single donors with incorporation of molecular oxygen

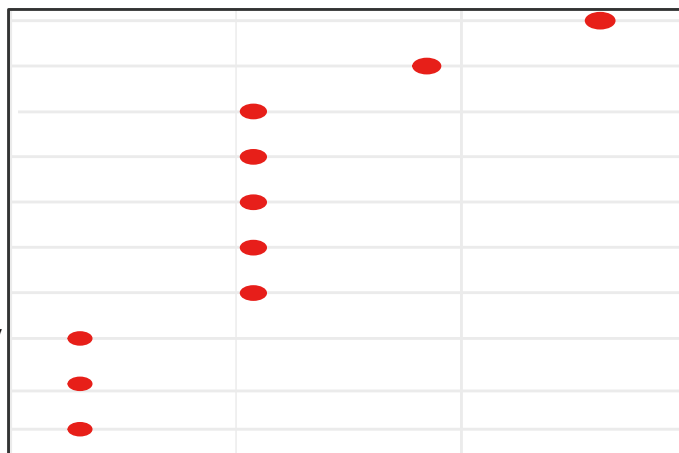

Count

- 2.5
- 5.0
- 7.5

qvalue

- 0.06
- 0.04
- 0.02
